# Supplementary material for: Probing the Antitumor Mechanism of Solanum nigrum L. Aqueous Extract against Human Breast Cancer MCF7 Cells
Source: PubMed Central journal article supplement (PMC6955812; doi:10.3390/bioengineering6040112), 2019-12-11
Supplement: bioengineering-06-00112-s001.pdf [file bioengineering-06-00112-s001.pdf]

## Supplementary materials

**Table 1. The gene-disease network parameters.**

| <b>Shared name</b> | <b>Stress</b>   | <b>Degree</b>   | <b>Betweenness</b> |
|--------------------|-----------------|-----------------|--------------------|
| <i>VEGFA</i>       | 327104          | 61              | 0.21018934         |
| <i>SERPINE1</i>    | 63058           | 22              | 0.06730401         |
| <i>PTGS2</i>       | 612124          | 102             | 0.41865882         |
| <i>PGR</i>         | 19374           | 10              | 0.01603795         |
| <i>NOTCH1</i>      | 102682          | 20              | 0.06518813         |
| <i>GSTP1</i>       | 213548          | 36              | 0.10127241         |
| <i>ESR2</i>        | 47314           | 18              | 0.03649152         |
| <i>ESR1</i>        | 151496          | 35              | 0.10189387         |
| <i>EGFR</i>        | 243690          | 44              | 0.12611847         |
| <i>EGF</i>         | 58976           | 19              | 0.03959679         |
| <i>CSF1</i>        | 6686            | 2               | 0.00666667         |
| <i>CDH13</i>       | 15654           | 8               | 0.00971709         |
| <i>CCND1</i>       | 152822          | 34              | 0.08052398         |
| <i>CCNA1</i>       | 12086           | 3               | 0.00682774         |
| <i>BRCA1</i>       | 47820           | 18              | 0.05325804         |
| <i>BCL2</i>        | 232832          | 46              | 0.15708805         |
| <i>ABCB1</i>       | 156564          | 37              | 0.1348579          |
| <i>ABCG2</i>       | 40290           | 8               | 0.01756229         |
| <b>Max</b>         | <b>612124</b>   | <b>102</b>      | <b>0.41865882</b>  |
| <b>Average</b>     | <b>139117.6</b> | <b>29.05556</b> | <b>0.091625171</b> |

**Table S2: The gene-drug network parameters.**

| <b>Name</b>     | <b>Stress</b>   | <b>Degree</b>    | <b>Betweenness</b> |
|-----------------|-----------------|------------------|--------------------|
| <i>VEGFA</i>    | 119738          | 14               | 0.18563528         |
| <i>SERPINE1</i> | 0               | 1                | 0                  |
| <i>PTGS2</i>    | 200482          | 59               | 0.31819843         |
| <i>PGR</i>      | 168016          | 38               | 0.18228367         |
| <i>GSTP1</i>    | 52190           | 16               | 0.07583039         |
| <i>ESR2</i>     | 388122          | 42               | 0.10486904         |
| <i>ESR1</i>     | 477798          | 79               | 0.41961072         |
| <i>EGFR</i>     | 179772          | 37               | 0.19924206         |
| <i>CSF1</i>     | 2               | 2                | 1                  |
| <i>CCND1</i>    | 6306            | 3                | 0.01213952         |
| <i>BRCA1</i>    | 12958           | 8                | 0.03741261         |
| <i>BCL2</i>     | 128632          | 14               | 0.22115822         |
| <i>ABCG2</i>    | 7446            | 4                | 0.01818148         |
| <i>ABCB1</i>    | 539750          | 65               | 0.66664994         |
| <i>NOTCH1</i>   | 0               | 1                | 0                  |
| <b>Max</b>      | <b>539750</b>   | <b>79</b>        | <b>1</b>           |
| <b>Average</b>  | <b>152080.8</b> | <b>25.533333</b> | <b>0.229414091</b> |
